1 **Pioneer factor GAF cooperates with PBAP and**  
2 **NURF to regulate transcription**

3

4

5

6 Julius Judd<sup>1</sup>, Fabiana M. Duarte<sup>1,2</sup>, John T. Lis<sup>1\*</sup>

7

8 <sup>1</sup>Department of Molecular Biology and Genetics, Cornell University, Ithaca, New York 14835, USA

9 <sup>2</sup>Department of Stem Cell and Regenerative Biology, Harvard University, Cambridge, MA 02138, USA

10 \*Correspondence to: [johnlis@cornell.edu](mailto:johnlis@cornell.edu)

11

12 **ORCID:** Julius Judd (0000-0002-4602-0205); Fabiana M. Duarte (0000-0002-1261-4929); John T. Lis  
13 (0000-0003-1201-9406)

14

15

## 16 **Summary**

17           Transcriptionally silent genes must be activated throughout development. This requires  
18 nucleosomes be removed from promoters and enhancers to allow transcription factor binding  
19 (TFs) and recruitment of coactivators and RNA Polymerase II (Pol II). Specialized pioneer TFs  
20 bind nucleosome-wrapped DNA to perform this chromatin opening by mechanisms that remain  
21 incompletely understood<sup>1-3</sup>. Here, we show that GAGA-factor (GAF), a *Drosophila* pioneer  
22 factor<sup>4</sup>, interacts with both SWI/SNF and ISWI family chromatin remodelers to allow  
23 recruitment of Pol II and entry to a promoter-proximal paused state, and also to promote Pol II's  
24 transition to productive elongation. We found that GAF functions with PBAP (SWI/SNF) to  
25 open chromatin and allow Pol II to be recruited. Importantly this activity is not dependent on  
26 NURF as previously proposed<sup>5-7</sup>; however, GAF also functions with NURF downstream of this  
27 process to ensure efficient Pol II pause release and transition to productive elongation apparently  
28 through its role in precisely positioning the +1 nucleosome. These results demonstrate how a  
29 single sequence-specific pioneer TF can synergize with remodelers to activate sets of genes.  
30 Furthermore, this behavior of remodelers is consistent with findings in yeast<sup>8-10</sup> and mice<sup>11-13</sup>,  
31 and likely represents general, conserved mechanisms found throughout Eukarya.

32

## 33 Main

34 Pioneer transcription factors are a class of transcription factors that can bind and open  
35 condensed chromatin. They control cell-fate decisions in development by opening chromatin at  
36 previously inactive lineage-specific promoters and enhancers via sequence-specific binding<sup>1-3</sup>.  
37 These factors possess the unique ability to bind nucleosome-wrapped DNA, but the question of  
38 how they evict nucleosomes and initiate transcription remains open.

39  
40 From yeast to mammals, there is growing evidence that pioneer factors cooperate with  
41 multiple ATP-dependent nucleosome remodeling complexes to establish transcription-  
42 permissive chromatin architecture<sup>8</sup>. In yeast, the pioneer factor Abf1 synergizes with the RSC  
43 complex (SWI/SNF family) to maintain the nucleosome-free region (NFR) of Abf1-bound  
44 promoters, while ISW1a and ISW2 are required to properly position the +1 nucleosome and  
45 phase downstream nucleosomes<sup>9</sup>. In mouse embryonic stem cells, the pioneer factors OCT4 and  
46 NANOG are codependent on BAF complex (SWI/SNF family) subunit BRG1 to bind and open  
47 chromatin at target sites<sup>11,13</sup>. Recent structural studies have illuminated how SWI/SNF family  
48 remodelers bidirectionally evict nucleosomes from promoter NFRs in yeast<sup>10</sup> and mammals<sup>12</sup>.

49  
50 GAGA-factor (GAF) is a *Drosophila* transcription factor encoded by the *Trithorax-like*  
51 (*trl*) gene<sup>14</sup> that preferentially binds GAGAG repeats, but is capable of binding a single GAG  
52 trinucleotide<sup>15</sup>. We have previously demonstrated that, in *Drosophila* cell cultures, GAF is  
53 essential for establishing paused Pol II on GAF-bound promoters, and that the NFRs of these  
54 promoters fill with nucleosomes upon GAF depletion<sup>16</sup>. Without this activity, the response of a  
55 subset of heat shock genes is impaired<sup>17</sup>. In early fly embryos, regions with chromatin signatures  
56 similar to those at binding sites of the embryonic pioneer factor Zelda—but lacking Zelda  
57 binding—are enriched for GAF binding, suggesting that GAF may also be an additional early  
58 embryonic pioneer factor<sup>4</sup>. GAF interacts physically with the NURF complex (Nucleosome  
59 Remodeling Factor) and both GAF and NURF are required to remodel nucleosomes on the *hsp70*  
60 promoter *in vitro*<sup>5,18</sup>. We have previously speculated that GAF recruits NURF to target  
61 promoters, which clears them of nucleosomes and allows Pol II initiation and subsequent pausing  
62 to proceed<sup>7</sup>. However, early studies speculated that GAF can also interact with Brahma (Brm)  
63 complexes (SWI/SNF family; BAP/PBAP)<sup>6</sup>, and recent evidence indicates that GAF physically  
64 interacts with PBAP (Polybromo associated Brm) but not BAP<sup>19,20</sup> in addition to NURF.

65  
66 To test which of these remodelers is responsible for GAF's ability to establish  
67 transcription-permissive chromatin architecture at target genes, we depleted GAF, NURF301,  
68 and BAP170 (unique subunits of the NURF and PBAP complexes that are essential for complex  
69 functionality)—as well as NURF301 and BAP170 simultaneously—in S2 cells using RNAi (Fig.

70 1a). After confirming knockdown efficiency (Extended Data Fig. 1), we used a combination of  
71 PRO-seq, ATAC-seq, and 3'RNA-seq to monitor changes in nascent transcription, chromatin  
72 state, and mRNA output.

73

#### 74 **GAF synergizes with PBAP to open chromatin**

75

76 We used a spike-in normalization strategy for PRO-seq and 3'RNA-seq (see methods) to  
77 ensure the detection of widespread transcriptional changes that can be hidden by centralizing  
78 normalization strategies such as RPKM<sup>21</sup>. A principal component analysis of all genome-wide  
79 data sets revealed that GAF-knockdown predominantly clusters with PBAP-knockdown (Fig. 1b,  
80 Extended Data Fig. 2). After confirming data quality (Extended Data Fig. 2–4), we defined a set  
81 of promoters that have downregulated pause region PRO-seq signal upon GAF knockdown  
82 (Extended Data Fig. 5a). Notably, the number of genes with GAF-dependent pausing was far  
83 greater than previously reported because our spike-in normalization scheme allowed us to  
84 examine the genome-wide effects of GAF depletion with unprecedented sensitivity (n=685 in  
85 this study, n=140 reported previously<sup>16</sup>). ATAC-seq hypersensitivity signal (fragments < 120 bp,  
86 see methods) revealed that these promoters are substantially less accessible upon GAF, PBAP, or  
87 NURF+PBAP knockdown (Fig. 1c–d, Extended Data Fig. 6), and PRO-seq shows that pausing is  
88 severely reduced upon GAF, PBAP, or NURF+PBAP knockdown, but not after NURF  
89 knockdown (Fig. 1c, e, f, Extended Data Fig. 6). These results clearly demonstrate that GAF  
90 coordinates with PBAP—not NURF as previously proposed—to regulate Pol II recruitment by  
91 evicting nucleosomes from the NFRs of target promoters. To our knowledge, this is the first  
92 report of a pioneer factor synergizing specifically with PBAP (or PBAF, the homologous  
93 mammalian complex) to maintain accessible target promoters in metazoans.

94

95 In contrast to PBAP, NURF knockdown increases PRO-seq signal in the pause region  
96 and in the gene body region compared to the LACZ-RNAi control, particularly in the early pause  
97 region closer to the TSS (Fig. 1f, left panel). We then compared the changes in pause region  
98 PRO-seq signal upon GAF knockdown to that observed after PBAP and NURF knockdown on a  
99 gene-by-gene basis. This revealed a near-perfect one-to-one correlation between GAF and PBAP  
100 knockdowns, but minor anticorrelation between GAF and NURF knockdowns (Fig. 1g, compare  
101 left panel to right panel, and Extended Data Fig. 7d for the NURF+PBAP knockdown). When we  
102 examined promoters with PBAP-dependent pausing (n=806; Extended Data Fig 5b), we  
103 observed similar trends to those seen at GAF-dependent promoters: decreased pausing and  
104 promoter accessibility after GAF, PBAP, and NURF+PBAP knockdown, and increased pausing  
105 and narrowed promoter accessibility upon NURF knockdown (compare Extended Data Fig. 7a–c



106 to Fig. 1d-f). Taken together, these data indicate that PBAP and GAF act together to free the  
107 promoter of nucleosomes, while NURF acts at a downstream step.

108

109 Is GAF's mechanistic role to bind nucleosome-bound DNA and recruit the PBAP  
110 remodeling complex where they act synergistically to remove nucleosomes, or does GAF  
111 binding have an intrinsic ability to displace nucleosomes? The striking loss of PRO-seq signal  
112 and loss of chromatin openness of promoters (Fig. 1c-d) described when either factor is depleted  
113 argues for a highly synergistic model, where GAF alone has little intrinsic chromatin opening  
114 activity. To investigate further, we compared ATAC-seq signal between the GAF and PBAP  
115 knockdown conditions, which revealed significant low-magnitude changes at only a small  
116 number of sites (Extended Data Fig. 8a), indicating that GAF does not possess sufficient intrinsic  
117 chromatin opening ability to account for the effects of GAF knockdown on chromatin. In further  
118 support of this, 88% of promoters with decreased pausing upon GAF knockdown had decreased  
119 pausing upon PBAP knockdown (n=603; Extended Data Fig. 8b).

120

121 Small sets of promoters show only GAF- or only PBAP-knockdown effects. We found  
122 that GAF-specific promoters (n=82; PBAP knockdown causes no change) had higher levels of  
123 GAF ChIP-seq signal and were far less sensitive to the GAF-knockdown than the class of genes  
124 dependent on both GAF and PBAP (Extended Data Fig. 8c-d). We speculate that these promoters  
125 may be held open by paused Pol II<sup>22</sup> that is generated by mechanisms independent of PBAP, or  
126 the level of PBAP remaining after knockdown was sufficient to be recruited by the high level of  
127 GAF bound at these promoters. PBAP-specific promoters are mostly not bound by GAF  
128 (Extended Data Fig. 8c), and often contain the binding motif for the transcription factor lola  
129 (Extended Data Fig. 8f), which might function like GAF in its collaboration with PBAP.

130

### 131 **M1BP can establish paused Pol II independent of GAF**

132

133 Not all GAF bound promoters have GAF-dependent pausing, and some of these bound  
134 but unaffected promoters are bound by M1BP (Motif 1 Binding Protein) and the insulator BEAF-  
135 32 (Boundary Element Associated Factor)<sup>16,23</sup>. However, it remains unclear whether M1BP acts  
136 redundantly with GAF to open promoters and promote pausing, or if M1BP/BEAF-32 simply  
137 insulate promoters from GAF's activity. To investigate this, we divided GAF-bound promoters  
138 into two classes based on whether they have GAF-dependent pausing (n=600) or not (n=1,245),  
139 and found that the BEAF-32 and M1BP motifs<sup>23,24</sup> were overrepresented in GAF-bound  
140 promoters with unchanged pausing (Fig. 2a). We then subdivided the class of GAF-bound, GAF-  
141 independent pausing genes by whether they were bound by M1BP<sup>23</sup> (n=152), BEAF-32<sup>25</sup>  
142 (n=152), or both (n=159; Fig. 2b). GAF-binding was weaker and more diffuse in GAF-bound

143 genes with GAF-independent pausing (Class II–IV), while these promoters were directly and  
144 strongly bound by either M1BP or BEAF-32 or both (Class II–IV). We know from our previous  
145 study that genes bound by M1BP have reduced pause region PRO-seq signal upon M1BP  
146 knockdown<sup>17</sup>, and this reduction in pausing correlates with M1BP binding intensity (Fig. 2b).  
147 Moreover, all classes of GAF-bound, GAF-independent pause genes had relatively unchanged  
148 ATAC-seq hypersensitivity signal in promoters after GAF or BAP knockdown (Fig 2b, left).  
149 This demonstrates that M1BP can open chromatin at promoters and create paused Pol II  
150 independent of GAF/PBAP, and the weak and diffuse GAF binding at these sites is insufficient  
151 to complement depletion of M1BP.

152

### 153 **NURF promotes transition to productive elongation**

154

155 GAF can physically interact with the remodelers PBAP and NURF<sup>5,19,20</sup> and appears to  
156 function with each remodeler at distinct steps in transcription: GAF and PBAP open chromatin  
157 allowing Pol II initiation and entry to the promoter-proximal pause site; while GAF and NURF  
158 ensure efficient transition to productive elongation. This role of GAF and PBAP in the first of  
159 these two steps is supported strongly by results described above (Fig 1). Evidence that NURF's  
160 role is downstream of PBAP is provided by the observation that the PBAP+NURF double-  
161 knockdown primarily mimics PBAP depletion in terms of changes in ATAC-seq and PRO-seq  
162 patterns in the pause region (Fig 1). Support for NURF's role in productive elongation comes in  
163 part from the fact that the PBAP knockdown only partially recapitulates the decrease in gene  
164 body polymerase density seen after GAF depletion (Fig. 1e, right panel). In contrast, the  
165 NURF+PBAP double-knockdown mirrors the GAF knockdown (Fig. 1f, right panel).  
166 Furthermore, CUT&RUN assays demonstrate co-occupancy of GAF and NURF at promoters  
167 genome-wide (Extended Data Fig. 9a), indicating GAF and NURF are likely to act together.  
168 These results support the model that GAF coordinates with both remodelers to ensure efficient  
169 transcription by first acting with PBAP to open chromatin and allow for the formation of  
170 promoter-proximal paused Pol II, and then with NURF to establish chromatin structure at the  
171 start of genes which ensures proper transition to productive elongation by Pol II.

172

173 How mechanistically can NURF contribute to productive elongation? Knockdown of  
174 NURF alone leads to increased highly proximal pausing on a set of promoters (n=831; Extended  
175 Data Fig. 5c) and this is coupled with improper +1 nucleosome positioning and phasing of early  
176 gene body nucleosomes at these promoters (Fig. 3a). We interpret this decrease in signal at the  
177 +1 nucleosome as misphasing, because less consistent positioning would lead to a decrease in  
178 aggregated signal at the dyad. While ATAC-seq is not the most precise method of mapping  
179 nucleosomes, in light of NURF's known activity of sliding +1 and sequential nucleosomes away

180 from the TSS and into properly spaced arrays<sup>26</sup>, we believe this evidence supports the conclusion  
181 that these promoters with increased pause region Pol II density upon NURF knockdown also  
182 have misphased +1 nucleosomes upon NURF knockdown. Therefore, NURF has a role in proper  
183 pausing and chromatin architecture in the early gene body, and without the activity of NURF,  
184 pause release and the transition to productive elongation are dysregulated (Fig. 1f).

185  
186 Our model that GAF recruits and functionally synergizes with NURF to ensure efficient  
187 pause release and transition to productive elongation predicts that mRNA output would be  
188 decreased upon NURF depletion. Indeed, this is observed quite broadly (Extended Data Fig. 5k).  
189 GAF interacts physically with NURF<sup>5,19,20</sup>, and GAF-dependent promoters have increased gene  
190 body Pol II density by PRO-seq (Fig. 1f, right panel); as such we reasoned that genes with  
191 increased gene body Pol II density upon NURF knockdown (n=831) might represent primary  
192 targets of NURF. Genes with increased GB PRO-seq signal in the NURF knockdown split into  
193 two classes with the majority having decreased mRNA-seq signal (Fig. 3b). This can be  
194 explained by Pol II moving more slowly without the activity of NURF, which leads to decreased  
195 mRNA output despite increased Pol II density (PRO-seq). Further analysis revealed that genes  
196 which increased GB PRO-seq and decreased 3'mRNA-seq upon NURF knockdown (Fig. 3b,  
197 bottom half), when compared to those that have increased GB PRO-seq and increased mRNA-  
198 seq signal (Fig. 3b, upper half), are normally: (i) less paused; (ii) more expressed; (iii)  
199 characterized by higher promoter ATAC-seq hypersensitivity signal that narrows upstream of the  
200 TSS upon NURF knockdown; (iv) marked by a well-positioned +1 nucleosome that shows  
201 decreased signal upon NURF knockdown; and (v) distinguished by greater gene body  
202 polymerase density that further increases upon NURF knockdown (Extended Data Fig. 9b–f,  
203 respectively). Taken together, we propose that these findings indicate that these moderately  
204 expressed, less paused genes depend more strongly upon the activity of NURF to ensure proper  
205 nucleosome positioning. Upon NURF depletion, nucleosomes present an energy barrier to  
206 productive elongation, which leads to higher gene body polymerase density despite lower mRNA  
207 output as a result of slow-moving polymerases.

208  
209 We speculate that without the activity of NURF, nucleosomes might drift into sequence-  
210 determined “energy wells”—tracts of DNA sequence where nucleosome eviction is less  
211 energetically favored—that are difficult for Pol II to transit, especially in the early stage of pause  
212 release. Under this model, without the assistance of NURF, both pause release and productive  
213 elongation would be inefficient due to the increased energy barrier more tightly DNA-associated  
214 nucleosomes present to transcribing Pol II. It was previously demonstrated that in the absence of  
215 NURF, +1 nucleosomes drift toward the TSS, and early gene body nucleosomes are mis-phased  
216 out to ~1kb at NURF-bound promoters using MNase-seq in *Drosophila* embryonic tissue<sup>26</sup>.

217 NURF mutant animals have less intense MNase-seq signal associated with the +1 nucleosome at  
218 NURF-bound promoters, and the signal maxima shifts ~12 bp towards the TSS<sup>26</sup>. Without  
219 NURF, these nucleosomes likely are free to drift into positions that are energetically opposed to  
220 Pol II transit, leading to inefficient pause release and therefore increased pause region PRO-seq  
221 signal. Taken together, these results indicate that GAF recruits NURF to promoters where it  
222 ensures proper nucleosome positioning in the early gene body for energetically favorable  
223 nucleosome transit by Pol II, a process downstream of PBAP's GAF-directed eviction of  
224 nucleosomes from NFRs.

225

## 226 **Summary**

227

228 We demonstrate that GAF is a sequence-specific pioneer factor in *Drosophila*, that  
229 depends on the activity of both SWI/SNF (PBAP) and ISWI (NURF) family ATP-dependent  
230 nucleosome remodeling complexes to establish optimal chromatin architecture for transcription  
231 at target promoters (Fig. 4a). SWI/SNF (PBAP) evicts nucleosomes from promoters, establishing  
232 a nucleosome-free region which allows Pol II to be recruited and initiate transcription (Fig. 4b).  
233 This first major step of transcription allows Pol II to begin transcription and progress to the  
234 promoter-proximal pause region. ISWI (NURF) then ensures that the nucleosomes along the  
235 early gene body are properly phased, thereby facilitating Pol II to transition to pause release and  
236 productive elongation in an energetically favorable manner (Fig. 4c). This work solidifies  
237 decades of *in vitro* biochemistry findings in *Drosophila* by resolving the roles of these factors *in*  
238 *vivo*, and to our knowledge is the first report of a pioneer factor working cooperatively with both  
239 ISWI and SWI/SNF remodelers to establish transcription-permissive chromatin at target  
240 promoters in metazoans.

241

242 These results indicate that a single pioneer transcription factor (GAGA-factor) is able to  
243 orchestrate the activity of multiple nucleosome remodeling complexes that regulate the first three  
244 stages of the transcription cycle (recruitment, pausing, and transition to productive elongation).  
245 GAF and PBAP knockdowns have virtually identical effects on promoter chromatin accessibility  
246 and Pol II pausing, showing that GAF synergizes with PBAP to clear promoters of nucleosomes  
247 and allow Pol II to be recruited, where it rapidly initiates transcription and traverses to the pause  
248 site. However, further analysis demonstrated that GAF also recruits NURF to position the +1  
249 nucleosome, which allows for efficient pause release and transition to productive elongation. The  
250 effects of the NURF knockdown are masked by the effects of the GAF/PBAP knockdowns,  
251 because without Pol II recruitment, nucleosome positioning along the gene body appears to be  
252 mostly irrelevant.

253

254 Strikingly, these roles for pioneer factors and specific nucleosome remodeler family  
255 members seem to also be consistent with limited recent data in mammals<sup>11,13</sup>, which indicate that  
256 this finding might represent a deeply conserved mechanism throughout all of Eukarya. To our  
257 knowledge, this is the first report of a single transcription factor with these expansive capabilities  
258 in metazoans, and the first view of not only how sequence specific pioneer factors and  
259 nucleosome remodelers unite to regulate chromatin, but also how the resulting chromatin  
260 structure effects nascent transcription and mRNA production.

261

#### 262 **Data availability.**

263 All sequencing data has been deposited in GEO (GSE149339). All DESeq2 results tables, raw  
264 signal and normalized bigWig files, gene lists, and ATAC-seq peaks can be accessed at  
265 <https://www.github.com/jaj256/GAF>. For ease of viewing, we have also created a custom UCSC  
266 track hub with pooled normalized data that can be imported to the UCSC genome browser using  
267 this link: <https://github.com/JAJ256/GAF/raw/master/hub.txt>.

268

#### 269 **Code availability.**

270 All code used to analyze data and create figures is available at:

271 <https://www.github.com/jaj256/GAF>.

272

#### 273 **Acknowledgements**

274 We would like to thank members of the Lis lab and Feschotte labs for critical reading of the  
275 manuscript and helpful discussions regarding data analysis. We thank Paul Badenhorst for open  
276 discussion and data-sharing regarding his work on NURF in *Drosophila* embryos. We thank the  
277 Cornell BRC Genomics facility and Peter Schweitzer for assistance with Illumina sequencing.  
278 We are grateful to Abdullah Ozer for assistance with PRO-cap TSS correction. This work was  
279 supported by NIH grants GM025232 and HG009393 to J.T.L. J.J. was supported by NHGRI  
280 fellowship F31HG010820. The content is solely the responsibility of the authors and does not  
281 necessarily represent the official views of the National Institutes of Health.

282

#### 283 **Author contributions**

284 J.J., F.M.D., and J.T.L. conceptualized the study and designed the experimental plan. J.J.  
285 performed all experiments and data analysis and wrote the first draft of the manuscript. J.J.,  
286 F.M.D., and J.T.L. revised the manuscript.

287

#### 288 **Competing interests**

289 The authors declare no competing interests.

290



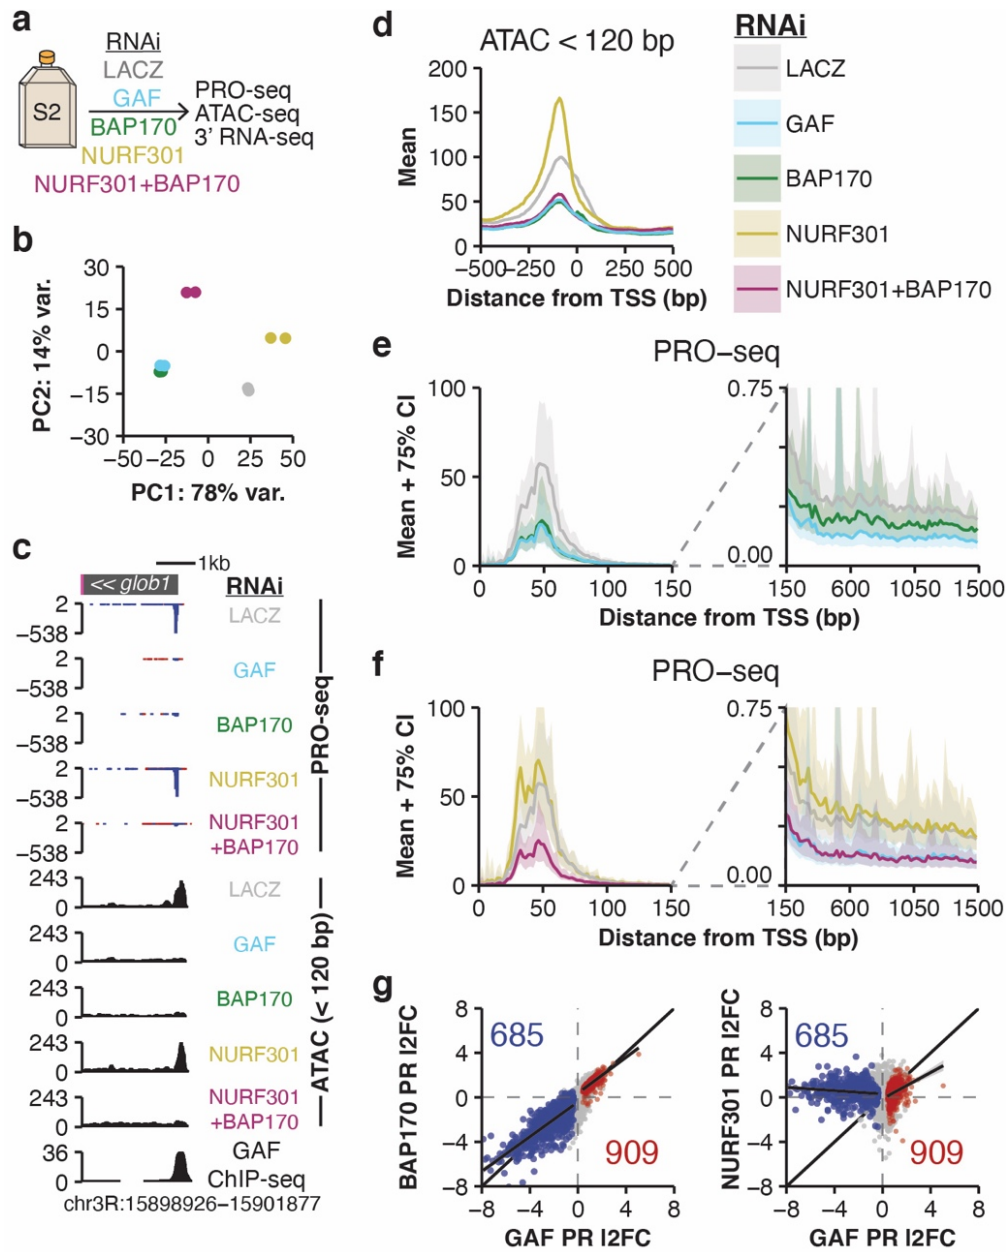

291

292 **Figure 1: GAGA-factor opens chromatin via the PBAP complex.**

293 (a) Experimental design.

294 (b) Principal component analysis of spike-in normalized PRO-seq signal in the pause region (TSS -  
295 50 to +100).

296 (c) Browser shot of *glob1-RB*.

297 (d) ATAC-seq (< 120 bp) signal in 1 bp bins at promoters with GAF-RNAi downregulated  
298 pausing (n=685; see Extended Data Figure 5a; DESeq2 FDR < 0.01). Signal is the mean  
299 of 1,000 sub-samplings of 10% of regions.

300 (e) PRO-seq signal for the LACZ, GAF, and BAP170 RNAi treatments. The pause region  
301 (left) is in 2 bp bins, and the gene body (right) is in 20 bp bins. Data is shown as mean  
302 (line)  $\pm$  75% confidence interval (shaded) from 1,000 sub-samplings of 10% of regions.  
303 Gene set as in (d).

304 (f) As in (e), but for LACZ, NURF301, and NURF301+BAP170 RNAi treatments. GAF-  
305 RNAi is also shown in the gene body region for comparison (blue line), though it is  
306 partially obscured by the NURF+PBAP line (purple) due to similarity of the trace.

307 (g) Pause region (TSS -50 to +100) PRO-seq log<sub>2</sub> fold change (l2FC) vs. the LACZ-RNAi  
308 control; GAF-RNAi compared to BAP170-RNAi (left) or NURF301-RNAi (right).  
309 Red/blue points are significantly changed by GAF-RNAi (DESeq2 FDR < 0.01). Also  
310 shown: a GLM and 95% confidence interval for up- and down-regulated promoters.  
311

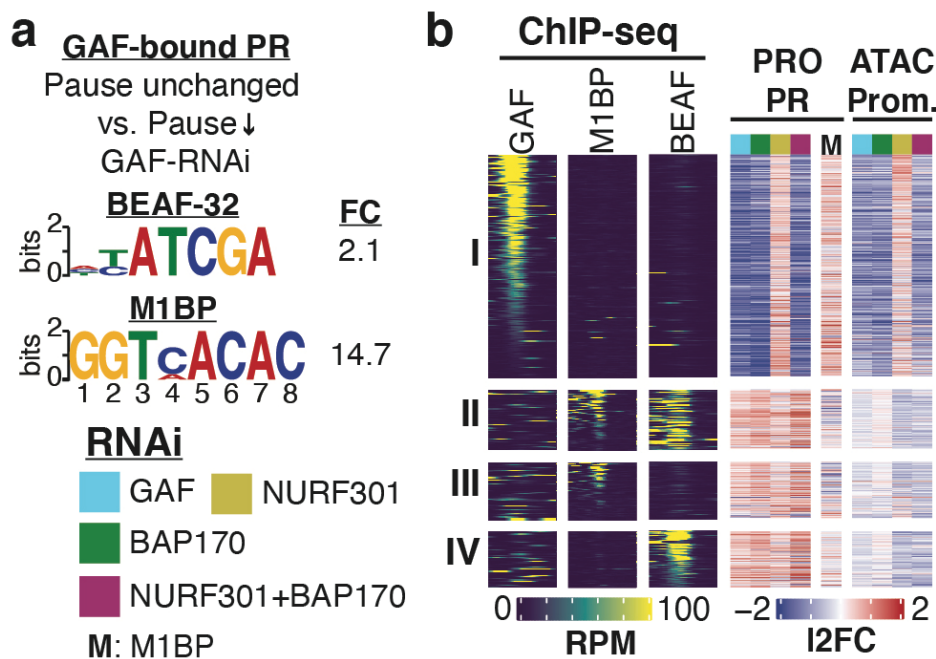

312

313 **Figure 2: M1BP and BEAF-32 block GAFs activity**

314 (a) Motifs enriched in GAF-bound promoters (GAF ChIP-seq peak within -500–TSS) with  
 315 GAF-independent pausing (n=1,245) over GAF-bound promoters with GAF-dependent  
 316 pausing (n=600). FC: fold change, DREME E-value < 0.001.

317 (b) GAF, M1BP, and BEAF-32 ChIP-seq signal in 10 bp bins in the promoter region (left,  
 318 TSS ± 500), pause region (TSS -50 to +100) PRO-seq log2 fold change (middle), and  
 319 promoter (-250 to TSS) ATAC-seq (< 120 bp) log2 fold change (right) at all GAF-bound  
 320 genes. (I) GAF-dependent pausing (n=600); (II–IV) GAF-independent pausing  
 321 (n=1,245); (II) M1BP and BEAF-32 bound (n=159); (III) M1BP only (n=152); (IV)  
 322 BEAF-32 only (n=152). Sort order: (I) GAF ChIP-seq; (II–III) M1BP ChIP-seq; (IV)  
 323 BEAF-32 ChIP-seq. GAF-bound GAF-independent genes without M1BP or BEAF-32  
 324 ChIP-seq signal are not shown (n=782).

325



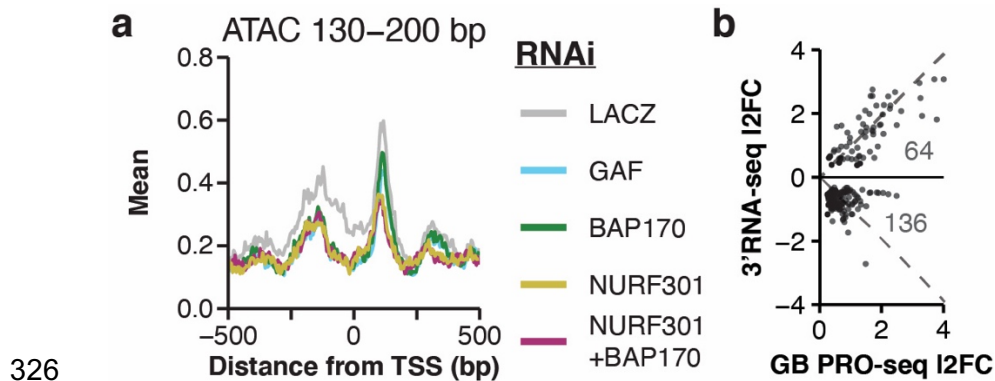

326

327 **Figure 3: NURF positions nucleosomes which influences pause release and elongation.**

328 **(a)** Centers of mononucleosome sized ATAC-seq (fragments 130–200 bp) signal in 1 bp bins  
329 at all promoters with NURF301-RNAi upregulated pausing (n=831; see Extended Data  
330 Figure 5C; DESeq2 FDR < 0.01). Signal is the mean of 1,000 sub-samplings of 10% of  
331 regions.

332 **(b)** PRO-seq gene body (TSS+200–TES-200) log<sub>2</sub> fold change compared to RNA-seq log<sub>2</sub>  
333 fold change (in the last 1 kb region) upon NURF301 RNAi treatment. Only genes with  
334 DESeq2 FDR < 0.1 for both PRO-seq and RNA-seq are shown. Number of points in each  
335 quadrant are also shown. Dashed lines are 1-to-1 I2FC.

336

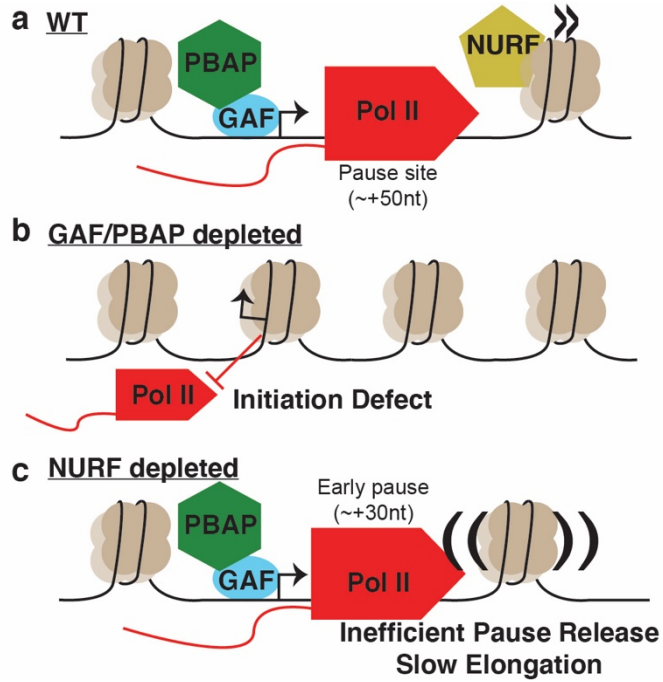

337

338 **Figure 4: Nucleosome remodelers and pioneer factors coordinate to establish permissive**  
339 **chromatin architecture.**

340 (a–c) Cartoon summarizing the findings of this article.

341

## 342 **References**

- 343 1. Zaret, K. S. & Mango, S. E. Pioneer transcription factors, chromatin dynamics, and cell  
344 fate control. *Curr. Opin. Genet. Dev.* **37**, 76–81 (2016).
- 345 2. Mayran, A. & Drouin, J. Pioneer transcription factors shape the epigenetic landscape. *J.*  
346 *Biol. Chem.* **293**, 13795–13804 (2018).
- 347 3. Vallot, A. & Tachibana, K. The emergence of genome architecture and zygotic genome  
348 activation. *Curr. Opin. Cell Biol.* **64**, 50–57 (2020).
- 349 4. Moshe, A. & Kaplan, T. Genome-wide search for Zelda-like chromatin signatures  
350 identifies GAF as a pioneer factor in early fly development. *Epigenetics Chromatin* **10**, 33  
351 (2017).
- 352 5. Xiao, H. *et al.* Dual functions of largest NURF subunit NURF301 in nucleosome sliding  
353 and transcription factor interactions. *Mol. Cell* **8**, 531–543 (2001).
- 354 6. Tsukiyama, T. & Wu, C. Purification and properties of an ATP-dependent nucleosome  
355 remodeling factor. *Cell* **83**, 1011–1020 (1995).
- 356 7. Vihervaara, A., Duarte, F. M. & Lis, J. T. Molecular mechanisms driving transcriptional  
357 stress responses. *Nat. Rev. Genet.* **19**, 385–397 (2018).
- 358 8. Kubik, S., Bruzzone, M. J. & Shore, D. Establishing nucleosome architecture and stability  
359 at promoters: Roles of pioneer transcription factors and the RSC chromatin remodeler.  
360 *Bioessays* **39**, (2017).
- 361 9. Krietenstein, N. *et al.* Genomic Nucleosome Organization Reconstituted with Pure  
362 Proteins. *Cell* **167**, 709-721.E12 (2016).
- 363 10. Wagner, F. R. *et al.* Structure of SWI/SNF chromatin remodeller RSC bound to a  
364 nucleosome. *Nature* **579**, 448–451 (2020).
- 365 11. Hainer, S. J., Bošković, A., McCannell, K. N., Rando, O. J. & Fazzio, T. G. Profiling of  
366 Pluripotency Factors in Single Cells and Early Embryos. *Cell* **177**, 1319-1329.E11 (2019).
- 367 12. He, S. *et al.* Structure of nucleosome-bound human BAF complex. *Science* **367**, 875–881  
368 (2020).
- 369 13. King, H. W. & Klose, R. J. The pioneer factor OCT4 requires the chromatin remodeller  
370 BRG1 to support gene regulatory element function in mouse embryonic stem cells. *Elife*  
371 **6**, (2017).
- 372 14. Farkas, G. *et al.* The Trithorax-like gene encodes the Drosophila GAGA factor. *Nature*  
373 **371**, 806–808 (1994).
- 374 15. Wilkins, R. C. & Lis, J. T. GAGA factor binding to DNA via a single trinucleotide  
375 sequence element. *Nucleic Acids Res.* **26**, 2672–2678 (1998).
- 376 16. Fuda, N. J. *et al.* GAGA factor maintains nucleosome-free regions and has a role in RNA  
377 polymerase II recruitment to promoters. *PLoS Genet.* **11**, e1005108 (2015).
- 378 17. Duarte, F. M. *et al.* Transcription factors GAF and HSF act at distinct regulatory steps to

- 379 modulate stress-induced gene activation. *Genes Dev.* **30**, 1731–1746 (2016).
- 380 18. Tsukiyama, T. & Wu, C. Purification and properties of an ATP-dependent nucleosome  
381 remodeling factor. *Cell* **83**, 1011–1020 (1995).
- 382 19. Lomaev, D. *et al.* The GAGA factor regulatory network: Identification of GAGA factor  
383 associated proteins. *PLoS One* **12**, e0173602 (2017).
- 384 20. Nakayama, T., Shimojima, T. & Hirose, S. The PBAP remodeling complex is required for  
385 histone H3.3 replacement at chromatin boundaries and for boundary functions.  
386 *Development* **139**, 4582–4590 (2012).
- 387 21. Mahat, D. B. *et al.* Base-pair-resolution genome-wide mapping of active RNA  
388 polymerases using precision nuclear run-on (PRO-seq). *Nat. Protoc.* **11**, 1455–1476  
389 (2016).
- 390 22. Gilchrist, D. A. *et al.* Pausing of RNA polymerase II disrupts DNA-specified nucleosome  
391 organization to enable precise gene regulation. *Cell* **143**, 540–551 (2010).
- 392 23. Li, J. & Gilmour, D. S. Distinct mechanisms of transcriptional pausing orchestrated by  
393 GAGA factor and M1BP, a novel transcription factor. *EMBO J.* **32**, 1829–1841 (2013).
- 394 24. Yang, J., Ramos, E. & Corces, V. G. The BEAF-32 insulator coordinates genome  
395 organization and function during the evolution of *Drosophila* species. *Genome Res.* **22**,  
396 2199–2207 (2012).
- 397 25. Liang, J. *et al.* Chromatin immunoprecipitation indirect peaks highlight long-range  
398 interactions of insulator proteins and Pol II pausing. *Mol. Cell* **53**, 672–681 (2014).
- 399 26. Kwon, S. Y., Grisan, V., Jang, B., Herbert, J. & Badenhorst, P. Genome-Wide Mapping  
400 Targets of the Metazoan Chromatin Remodeling Factor NURF Reveals Nucleosome  
401 Remodeling at Enhancers, Core Promoters and Gene Insulators. *PLoS Genet.* **12**,  
402 e1005969 (2016).
- 403

## 404 **Methods**

405 **Cell culture and RNAi treatments.** *Drosophila* S2 cells were maintained at 25 °C in M3 +  
406 BPYE medium with 10% FBS. Two biological replicates were performed for each RNAi  
407 treatment as previously described<sup>17</sup>, except dsRNA complementary to LACZ, GAF, BAP170,  
408 NURF301, or both BAP170 and NURF301 was added to cultures. We generated dsRNA by PCR  
409 amplifying a dsDNA template from S2 genomic DNA with T7 RNA Polymerase promoters on  
410 the 5' end of both strands, and then generated dsRNA using lab-made T7 RNA Polymerase. See  
411 Supplementary Table 1 for oligonucleotide primer sequences. All RNAi treatments were done  
412 using 10 µg/mL dsRNA, including the BAP170+NURF301 condition (5 µg/mL each). After 5  
413 days, an equal volume of 25 °C serum-free M3 + BYPE was added to cultures and they were  
414 incubated at 25 °C for 20 min (this was to mimic a paired heat-stress experiment that was  
415 performed alongside these experiments but is not presented in this publication). Cells were then  
416 harvested for PRO-seq, ATAC-seq, and 3'RNA-seq, and aliquots were lysed by boiling in 1x  
417 Laemmli buffer for western blot analysis.

418  
419 **Western blots.** Western blots were performed using anti-GAF (lab-made, 1:500) or anti-  
420 NURF301 (Novus Biologicals Cat. No. 40360002; 1:100), with anti-Chromator (lab-made,  
421 1:2000) as a loading control. Loading was standardized by cell number and for each RNAi  
422 treatment, a serial 2-fold dilution curve was analyzed compared to the LACZ-RNAi condition.  
423 Protein was detected using dual-color secondary antibodies and blots were imaged using the LI-  
424 COR Odyssey system.

425  
426 **Custom genomes.** To facilitate accurate counting of spike-in reads, published PRO-seq data that  
427 did not contain spiked-in human cells<sup>17</sup>, was aligned to a repeat-masked human genome (hg38  
428 assembly<sup>27</sup>, retrieved from the UCSC genome browser<sup>28</sup>) using bowtie2<sup>29</sup> using default  
429 parameters. Unique alignments (mapq > 1) were retained, and any regions with alignments were  
430 masked using bedtools maskfasta<sup>30</sup>. This custom-masked genome was then combined with the  
431 *Drosophila* genome (dm6 genome assembly<sup>31</sup>, retrieved from the UCSC genome browser<sup>28</sup>). This  
432 allowed us to align PRO-seq data (containing both human- and fly- derived sequences) to this  
433 combined genome and ensured that no drosophila-derived reads aberrantly mapped to the human  
434 genome and skewed spike-in normalization factors. We also masked any region in the dm6  
435 genome assembly larger than 100 bp with greater than 80% homology to *Hsp70Aa* in order to  
436 uniquely map sequencing data to a single copy of *Hsp70*.

437  
438 **Gene annotations.** We started with a list of all unique FlyBase transcripts<sup>32</sup>, and reassigned the  
439 TSS based on the site of maximum PRO-cap signal<sup>33</sup> in the window of TSS ± 50 bp. We then  
440 filtered out transcripts less than 500 bp long and removed any duplicate transcripts (occasionally

441 two isoforms with TSSs within 50 bp of each other are corrected to the same PRO-cap maximum  
442 site, resulting in a duplicate transcript). We then discarded any transcript for which length-  
443 normalized PRO-seq signal in the TSS-upstream region (-400 to -100) was more than half that in  
444 the pause region (-50 to +100) or more than that in the gene body region (TSS+200 to TES-200).  
445 This removed transcripts for which read-through transcription from an upstream gene is a major  
446 driver of signal within that gene and removes most transcript isoforms other than the most  
447 expressed isoform. This filtering left a list of 9,375 genes, which was the starting point for  
448 DESeq2<sup>34</sup> differential expression testing and PCA analyses.

449  
450 **PRO-seq library preparation.** PRO-seq library preparation was performed as previously  
451 described<sup>21,33</sup> using  $2 \times 10^7$  cells per condition. We spiked in  $2.7 \times 10^5$  human K562 cells  
452 immediately after harvesting cells to facilitate robust normalization of PRO-seq data. We  
453 substituted MyOne C1 Streptavidin beads for the M280 beads recommended by the published  
454 protocol, as their negatively charged surface is thought to reduce non-specific nucleic acid  
455 binding, and we used 5' and 3' adapters that each had a 6N unique molecular identifier at the  
456 ligation junction to facilitate computational PCR deduplication of reads. PRO-seq libraries were  
457 all amplified for 11 PCR cycles and sequenced on an Illumina NextSeq in 37x37 paired end  
458 mode.

459  
460 **PRO-seq data analysis.** Data quality was assessed with fastqc<sup>35</sup>. Adapters were trimmed and  
461 UMIs were extracted using fastp<sup>36</sup>, and rRNA reads were removed using bowtie2<sup>29</sup>. Reads were  
462 then aligned to the combined dm6/hg38 genome assembly described above and reads aligning  
463 uniquely (mapq > 10) to the human genome were counted for spike-in normalization. Reads  
464 were then mapped to the dm6 genome using bowtie2<sup>29</sup>, and only uniquely mapping reads (mapq  
465 > 10) were retained. Alignments were PCR-deduplicated using UMI-tools<sup>37</sup> (spike-in alignments  
466 were also de-duplicated). BigWig coverage tracks of alignment 3' end positions in single base  
467 pair bins were then generated using deepTools<sup>38</sup>. Normalization factors were derived by taking  
468 the minimum number of reads mapped to the spike-in genome across all samples and dividing  
469 that by the number of mapped spike-in reads for each sample (Supplementary Equation 1). The  
470 alignment pipeline used can be found at [http://github.com/jaj256/PROseq\\_alignment.sh](http://github.com/jaj256/PROseq_alignment.sh), commit  
471 55a08db). See Supplementary Table 2 for PRO-seq alignment metrics and normalization factors.

472  
473 **ATAC-seq library preparation.** ATAC-seq was performed as previously described<sup>39</sup>, with  
474 some modifications for *Drosophila* cells. Briefly,  $10^5$  cells were washed with ice-cold PBS, and  
475 then resuspended in ice-cold lysis buffer (10 mM Tris-Cl pH 7.4, 10 mM NaCl, 3 mM MgCl<sub>2</sub>,  
476 0.1% NP-40, and 1x Pierce Protease Inhibitors [Thermo Scientific]) and incubated on ice for 3  
477 min. Nuclei were then pelleted and resuspended in Transposition buffer (10 mM Tris-Cl pH 7.4,



478 10% DMF, and 5 mM MgCl<sub>2</sub>), and 1.5 μL of lab-made Tn5 transposase was added. After a 30  
479 min incubation in a thermomixer at 37 °C, DNA was extracted using phenol:chloroform, PCR  
480 amplified for 11 cycles, and sequenced on an Illumina NextSeq in 37x37 paired end mode.

481  
482 **ATAC-seq data analysis.** Reads were aligned to the dm6 genome assembly using bowtie2<sup>29</sup> in  
483 local mode, and only unique alignments were retained (mapq > 10). Signal was then divided into  
484 two classes: hypersensitivity (paired end alignments with fragment size < 120 bp, which  
485 represents hypersensitive chromatin and generates fragments smaller than mononucleosomes),  
486 and mononucleosome (paired end alignments with fragment size 130–200 bp, which represents  
487 two transposition events that roughly flank a mononucleosome sized region). Coverage tracks  
488 were generated using deepTools<sup>38</sup>. For hypersensitivity signal, entire alignments were “piled up”  
489 to generate coverage tracks, and for mononucleosome data only the central 3 bp of each  
490 alignment were considered. ATAC-seq peaks were called using macs2<sup>40</sup>. See Supplementary  
491 Table 3 for alignment metrics.

492  
493 **3’RNA-seq.** 3’RNA-seq libraries were prepared using the QuantSeq 3’ mRNA-seq Library Prep  
494 Kit (Lexogen) with the UMI add-on kit. For each condition, 10<sup>6</sup> cells were added to a fixed  
495 amount of ERCC Spike-In RNA Mix (Invitrogen), and RNA was extracted using TRIzol reagent  
496 (Invitrogen). RNA treated with RNase free DNase I (Thermo Scientific), and the absence of  
497 DNA was confirmed using the Qubit dsDNA-HS assay (Thermo Scientific). RNA quality was  
498 confirmed using denaturing agarose gel electrophoresis. 3’RNA-seq libraries were prepared  
499 using 325 ng of total RNA per condition according to manufacturer instructions and sequenced  
500 on an Illumina NextSeq in 75 bp single end mode. Reads were trimmed of adapter and polyA  
501 sequences and UMIs were extracted using fastp<sup>36</sup>. Reads were then aligned to a combined  
502 dm6/ERCC reference genome using STAR<sup>41</sup>, and reads mapped to the ERCC standards were  
503 counted for spike-in normalization. Alignments were PCR-deduplicated using UMI-tools<sup>37</sup>, and  
504 only unique reads were retained (mapq = 255). The 5’ ends of reads were used to generate signal  
505 tracks (so that transcripts were scored in a read-length independent manner) using deepTools<sup>38</sup>.  
506 Spike-in normalization factors were calculated as described above for PRO-seq. See  
507 Supplemental Table 4 for alignment metrics and normalization factors.

508  
509 **CUT&RUN.** CUT&RUN was performed as described<sup>42,43</sup>. We used both anti-GAF (lab-made)  
510 or anti-NURF301(Novus Biologicals Cat. No. 40360002) at a 1:10 dilution for the antibody  
511 binding step. ProteinA-MNase was incubated with calcium on ice for 30 minutes, and cleaved  
512 fragments were recovered by phenol:chloroform extraction. Library prep was performed using  
513 the following steps: (i) Ends of digested fragments were repaired by incubation for 30 min at 25  
514 °C with 0.5 U/μL T4 PNK, 0.12 U/μL T4 DNA Polymerase, and 0.05 U/μL Klenow Fragment in

515 1X T4 DNA ligase buffer (with ATP) and 0.5 mM dNTPs; (ii) Fragments were A-tailed by  
516 incubation for 30 min at 37 °C with 0.25 U/ $\mu$ L Klenow exo- and 0.5 mM dATP in 1X NEBuffer  
517 2; (iii) Adapters were added by incubation on the lab bench for 2 h with 4.38 nM lab-made  
518 Illumina TruSeq forked adapters and 24 U/ $\mu$ L T4 DNA ligase in 1X T4 DNA Ligase buffer  
519 (with ATP); (iv) library DNA was recovered using AMPure XP beads (1.8X concentration) and  
520 PCR amplified for 15 cycles (all enzymes from New England Biolabs). Libraries were sequenced  
521 on an Illumina NextSeq in 37x37 paired end mode. Adapters sequences were removed using  
522 fastp<sup>36</sup>, and reads were aligned to the dm6 reference genome using bowtie2<sup>29</sup>. Only uniquely  
523 mapped reads (mapq > 10) with fragment size smaller than 120 bp were retained, and signal  
524 coverage tracks were generated using deepTools<sup>38</sup>. Signal was normalized per million mapped  
525 reads. See Supplementary Table 5 for alignment metrics.

526  
527 **Reanalysis of Published Data.** GAF ChIP-seq<sup>16</sup> raw reads were downloaded and mapped to the  
528 dm6 genome assembly using bowtie2<sup>29</sup>, and only uniquely mapping reads were retained (mapq >  
529 10). Single end reads were extended 200 bp and reads-per-million normalized coverage tracks  
530 were generated using deepTools<sup>38</sup>. Peaks were called using macs2<sup>40</sup>. A M1BP ChIP-seq<sup>23</sup> signal  
531 track was downloaded and converted for the dm6 assembly using liftOver<sup>28</sup>, and signal was  
532 normalized on a per-million basis. M1BP-knockdown PRO-seq<sup>17</sup> normalized signal tracks were  
533 accessed and converted to the dm6 genome assembly as above. BEAF-32 ChIP-seq<sup>25</sup> raw reads  
534 were downloaded, aligned using bowtie2<sup>29</sup>, and only uniquely mapping reads were retained  
535 (mapq > 10). Single end reads were extended 200 bp and reads-per-million normalized coverage  
536 tracks were generated using deepTools<sup>38</sup>. See Supplementary Table 6 for accession numbers for  
537 all published data used in this manuscript.

538  
539 **DE testing.** Signal counting in each set of regions for each data type was performed using  
540 functions from the BRGenomics package<sup>44</sup>. Differential expression testing and principal  
541 component analysis was performed using DESeq2<sup>34</sup>. Genes with adjusted p-value < 0.01 were  
542 considered differentially expressed. See Supplemental Code 6 for details.

543  
544 **Browser shots.** Browser shots were generated using a custom R function, which can be found at  
545 [https://github.com/JAJ256/browser\\_plot.R](https://github.com/JAJ256/browser_plot.R) (commit 1352d5c).

546  
547 **Metaprofiles.** Metaprofiles were generated using the BRGenomics package<sup>44</sup> by calculating a  
548 signal matrix across all regions in a set using the bin size specified, then sampling 10% of  
549 regions 1000 times to calculate the mean and 75% confidence interval. In some cases, confidence  
550 intervals were removed to avoid over-plotting. Visualization was performed using ggplot2<sup>45</sup>.

551



552 **Motif analysis.** To search for motifs overrepresented in one set of promoters compared to  
553 another, we used DREME<sup>46</sup> with an e-value threshold of 0.001.

554

555 **Classification of GAF-bound promoters.** We considered a promoter GAF-bound if the  
556 promoter region (-500 to TSS) overlapped with a GAF ChIP-seq peak (see above). We then  
557 considered these GAF-bound promoters as having GAF-dependent pausing or GAF-independent  
558 pausing on the basis of whether or not they had significantly decreased PRO-seq in the pause  
559 region compared to the LACZ-RNAi control (DESeq2 FDR < 0.01, log<sub>2</sub> Fold Change < 0). We  
560 further subdivided the GAF-bound promoters with GAF-independent pausing by whether they  
561 were bound by M1BP, BEAF-32, or both, with “bound” defined as falling within the top 25% of  
562 promoters in our total set of GAF-bound promoters with GAF-independent pausing when rank-  
563 ordered by total ChIP-seq signal within the promoter (-500 to TSS) for a given factor. Heatmaps  
564 were created using the ComplexHeatmap R package<sup>47</sup>.

565

566 **References (Methods)**

- 567 27. Lander, E. S. *et al.* Initial sequencing and analysis of the human genome. *Nature* **409**,  
568 860–921 (2001).
- 569 28. Haeussler, M. *et al.* The UCSC Genome Browser database: 2019 update. *Nucleic Acids*  
570 *Res.* **47**, D853–D858 (2019).
- 571 29. Langmead, B. & Salzberg, S. L. Fast gapped-read alignment with Bowtie 2. *Nat. Methods*  
572 **9**, 357–359 (2012).
- 573 30. Quinlan, A. R. & Hall, I. M. BEDTools: A flexible suite of utilities for comparing  
574 genomic features. *Bioinformatics* **26**, 841–842 (2010).
- 575 31. Hoskins, R. A. *et al.* The Release 6 reference sequence of the *Drosophila melanogaster*  
576 genome. *Genome Res.* **25**, 445–458 (2015).
- 577 32. Thurmond, J. *et al.* FlyBase 2.0: the next generation. *Nucleic Acids Res.* **47**, D759–D765  
578 (2019).
- 579 33. Kwak, H., Fuda, N. J., Core, L. J. & Lis, J. T. Precise maps of RNA polymerase reveal  
580 how promoters direct initiation and pausing. *Science*. **339**, 950–953 (2013).
- 581 34. Love, M. I., Huber, W. & Anders, S. Moderated estimation of fold change and dispersion  
582 for RNA-seq data with DESeq2. *Genome Biol.* **15**, 550 (2014).
- 583 35. Andrews, S. FastQC: A quality control tool for high throughput sequence data. (2010).  
584 Available at: <http://www.bioinformatics.babraham.ac.uk/projects/fastqc/>.
- 585 36. Chen, S., Zhou, Y., Chen, Y. & Gu, J. fastp: an ultra-fast all-in-one FASTQ preprocessor.  
586 *Bioinformatics* **34**, i884–i890 (2018).
- 587 37. Smith, T., Heger, A. & Sudbery, I. UMI-tools: modeling sequencing errors in Unique  
588 Molecular Identifiers to improve quantification accuracy. *Genome Res.* **27**, 491–499  
589 (2017).
- 590 38. Ramírez, F., Dündar, F., Diehl, S., Grüning, B. A. & Manke, T. deepTools: a flexible  
591 platform for exploring deep-sequencing data. *Nucleic Acids Res.* **42**, W187–W191 (2014).
- 592 39. Buenrostro, J. D., Wu, B., Chang, H. Y. & Greenleaf, W. J. ATAC-seq: A Method for  
593 Assaying Chromatin Accessibility Genome-Wide. *Curr. Protoc. Mol. Biol.* **109**, 21.29.1-  
594 21.29.9 (2015).
- 595 40. Zhang, Y. *et al.* Model-based analysis of ChIP-Seq (MACS). *Genome Biol.* **9**, (2008).
- 596 41. Dobin, A. *et al.* STAR: ultrafast universal RNA-seq aligner. *Bioinformatics* **29**, 15–21  
597 (2013).
- 598 42. Skene, P. J. & Henikoff, S. An efficient targeted nuclease strategy for high-resolution  
599 mapping of DNA binding sites. *Elife* **6**, (2017).
- 600 43. Skene, P. J., Henikoff, J. G. & Henikoff, S. Targeted in situ genome-wide profiling with  
601 high efficiency for low cell numbers. *Nat. Protoc.* **13**, 1006–1019 (2018).
- 602 44. DeBerardine, M. BRGenomics: Tools for the efficient analysis of high-resolution

- 603 genomics data. R package version 0.99.31. (2020). doi:10.18129/B9.bioc.BRGenomics  
604 45. Wickham, H. *ggplot2: Elegant Graphics for Data Analysis*. (Springer-Verlag, New York,  
605 2016).  
606 46. Bailey, T. L. DREME: Motif discovery in transcription factor ChIP-seq data.  
607 *Bioinformatics* **27**, 1653–1659 (2011).  
608 47. Gu, Z., Eils, R. & Schlesner, M. Complex heatmaps reveal patterns and correlations in  
609 multidimensional genomic data. *Bioinformatics* **32**, 2847–2849 (2016).  
610

611 **Extended Data Figures**

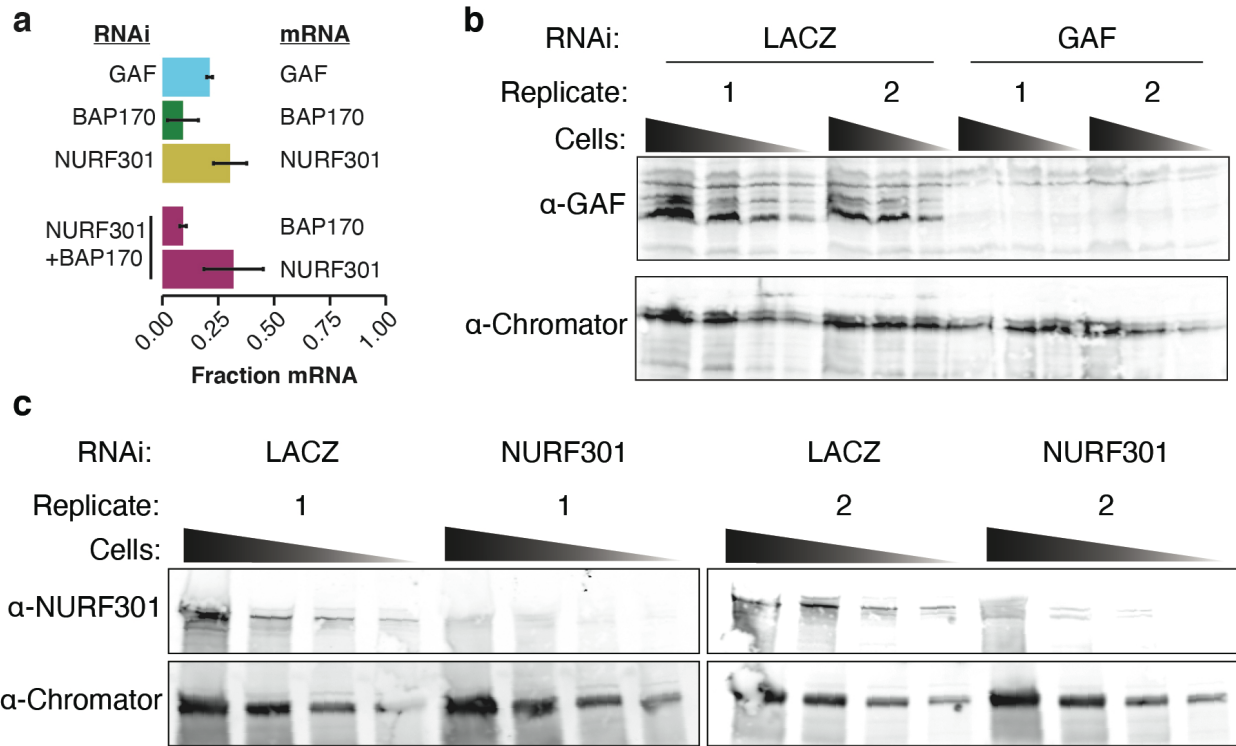

612

613 **Extended Data Figure 1: Knockdown efficiency of GAF-RNAi and NURF301-RNAi by**  
 614 **western blot.**

615 (a) Fraction mRNA remaining compared to the LACZ control for each knockdown target. *BAP170*  
 616 and *NURF301* transcript levels are displayed independently for the double knockdown. Bar  
 617 height is mean; error bars are SD.

618 (b) Western blot showing the amount of GAF protein remaining after 5 days of RNAi treatment  
 619 compared to the LACZ-RNAi control. For each condition a serial 2-fold dilution series of cells  
 620 was loaded. Chromator is included as a loading control.

621 (c) Western blot showing the amount of NURF301 protein remaining after 5 days of RNAi  
 622 treatment compared to the LACZ-RNAi control. For each condition a serial 2-fold series  
 623 of cells was loaded. Chromator is included as a loading control.

624

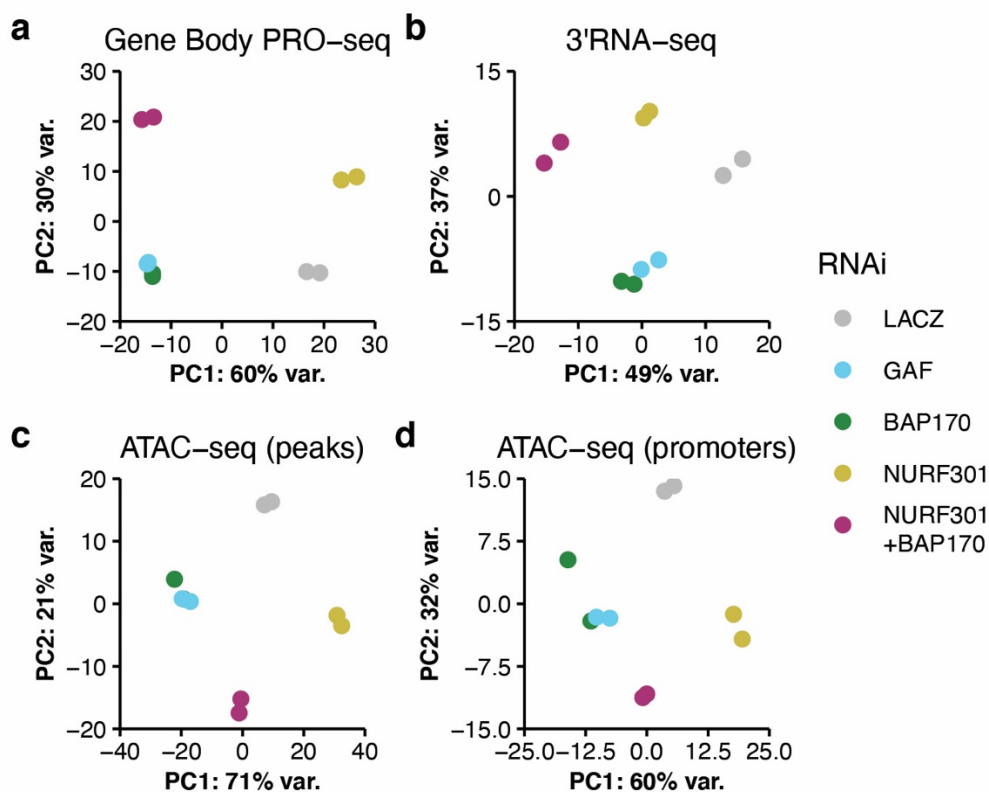

625

626 **Extended Data Figure 2: Principal component analysis of gene body PRO-seq, 3'RNA-seq,**  
627 **and ATAC-seq.**

- 628 (a) Principal component analysis of spike-in normalized PRO-seq signal in the gene body (TSS+200  
629 to TES-200) of genes in a filtered list (see methods, n=9,375).
- 630 (b) Principal component analysis of spike-in normalized 3'RNA-seq signal of genes in a filtered list  
631 (n=9,375), signal was counted in the last 1 kb region of each gene.
- 632 (c) Principal component analysis of library size-normalized ATAC-seq signal in ATAC-seq peak  
633 summits  $\pm$  100 bp (n=39,806).
- 634 (d) Principal component analysis of library size-normalized ATAC-seq signal in promoter regions (-  
635 1000-TSS) of genes in a filtered list (n=9,375).
- 636

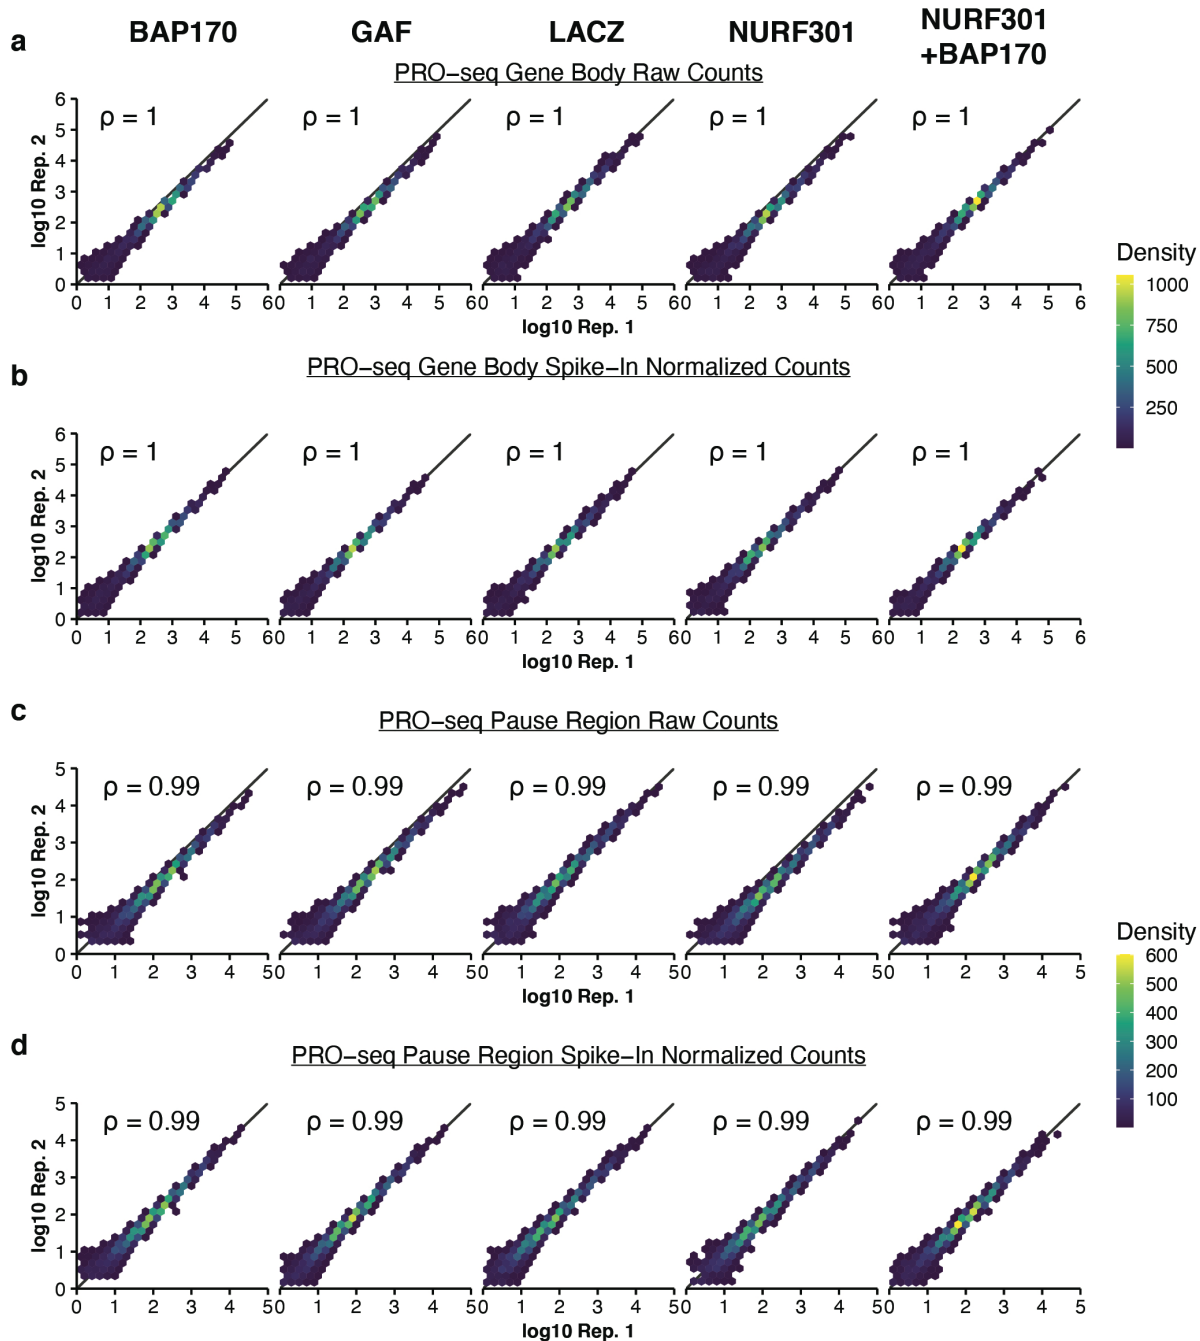

637

### 638 Extended Data Figure 3: Correlation and normalization of PRO-seq data

- 639 (a) Raw number of PRO-seq reads mapped to the gene body (TSS+200 to TES-200) of each gene in  
640 a filtered list (n=9,375, see methods) for all conditions, with replicate 1 on the x-axis and  
641 replicate 2 on the y-axis.  $\rho$  is Spearman's rho. To accommodate overplotting, the plot space was  
642 divided into hexbins and color-mapped by the number of genes in each bin.  
643 (b) As in (a), but counts were normalized using spike-in scaling factors.

- 644        **(c)** As in **(a)**, but raw number of PRO-seq reads mapped to the pause region (-50 to +100) of each  
645            gene.
- 646        **(d)** As in **(c)**, but counts were normalized using spike-in scaling factors.
- 647

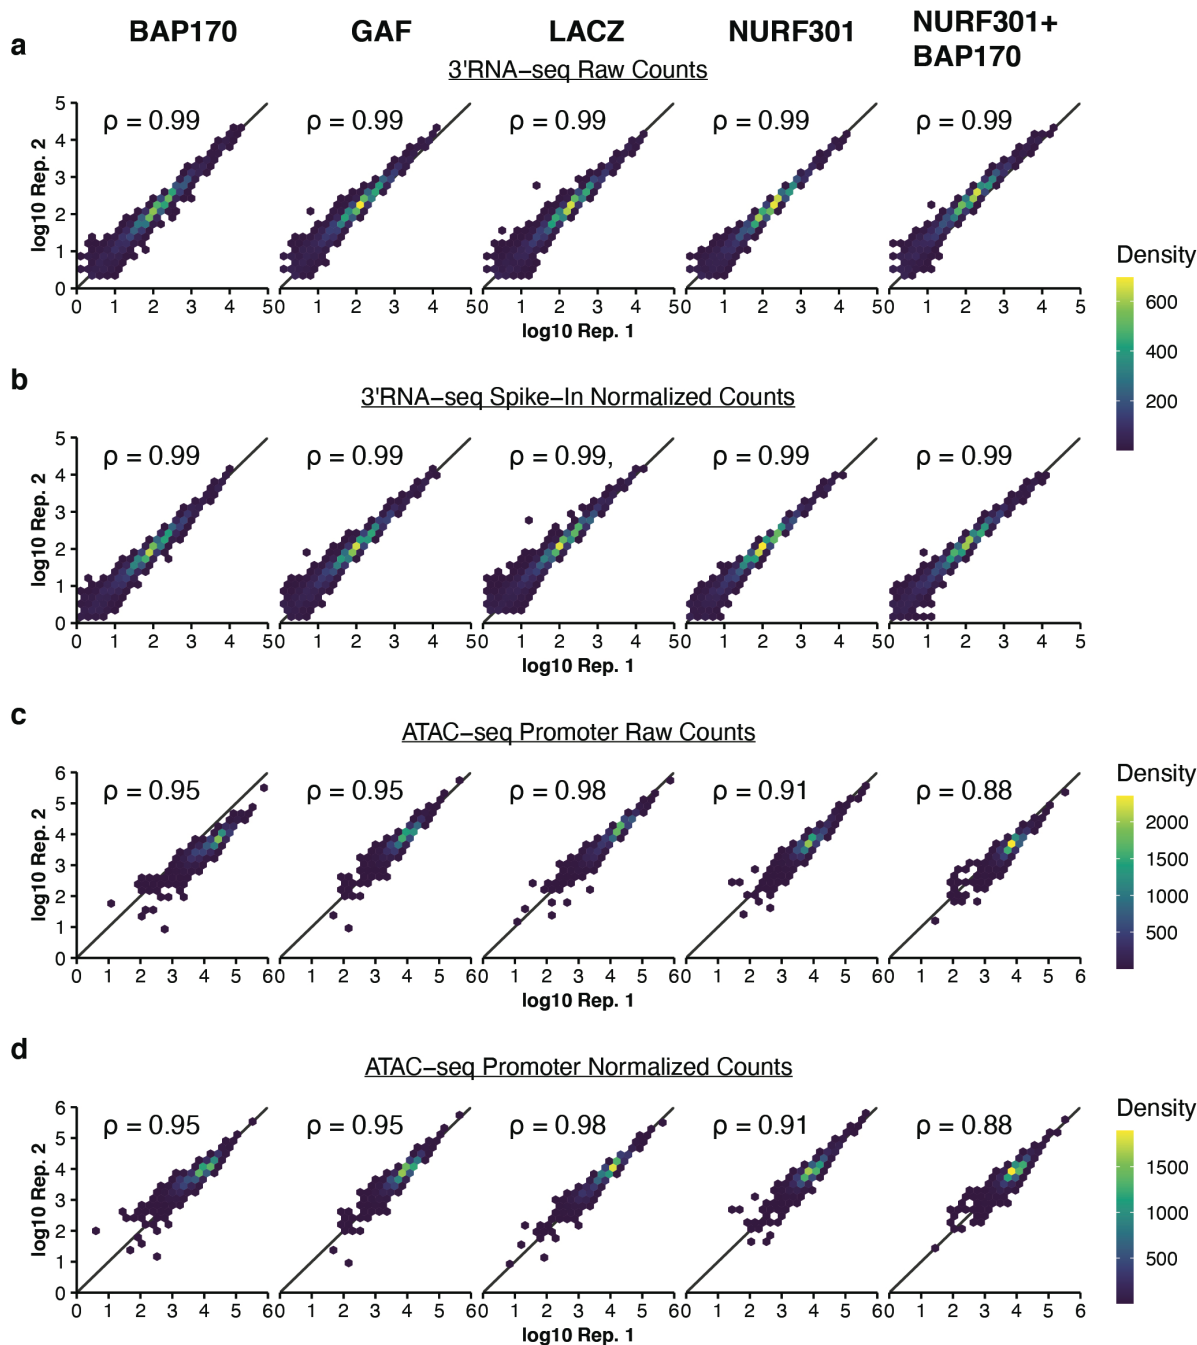

648

649 **Extended Data Figure 4: Correlation and normalization of RNA-seq and ATAC-seq data**

- 650 (a) Raw number of 3'RNA-seq reads mapped to the last 1 kb region of each gene in a filtered list  
 651 (n=9,375, see methods) for all conditions, with replicate 1 on the x-axis and replicate 2 on the y-  
 652 axis.  $\rho$  is Spearman's rho. To accommodate overplotting, the plot space was divided into hexbins  
 653 and color-mapped by the number of genes in each bin.  
 654 (b) As in (a), but counts were normalized using spike-in scaling factors.



- 655        **(c)** As in **(a)**, but raw number of ATAC-seq reads (< 120bp) mapped to the promoter region (-1000–  
656            TSS) of each gene.
- 657        **(d)** As in **(c)**, but counts were normalized using library-size scaling factors (DESeq2).  
658

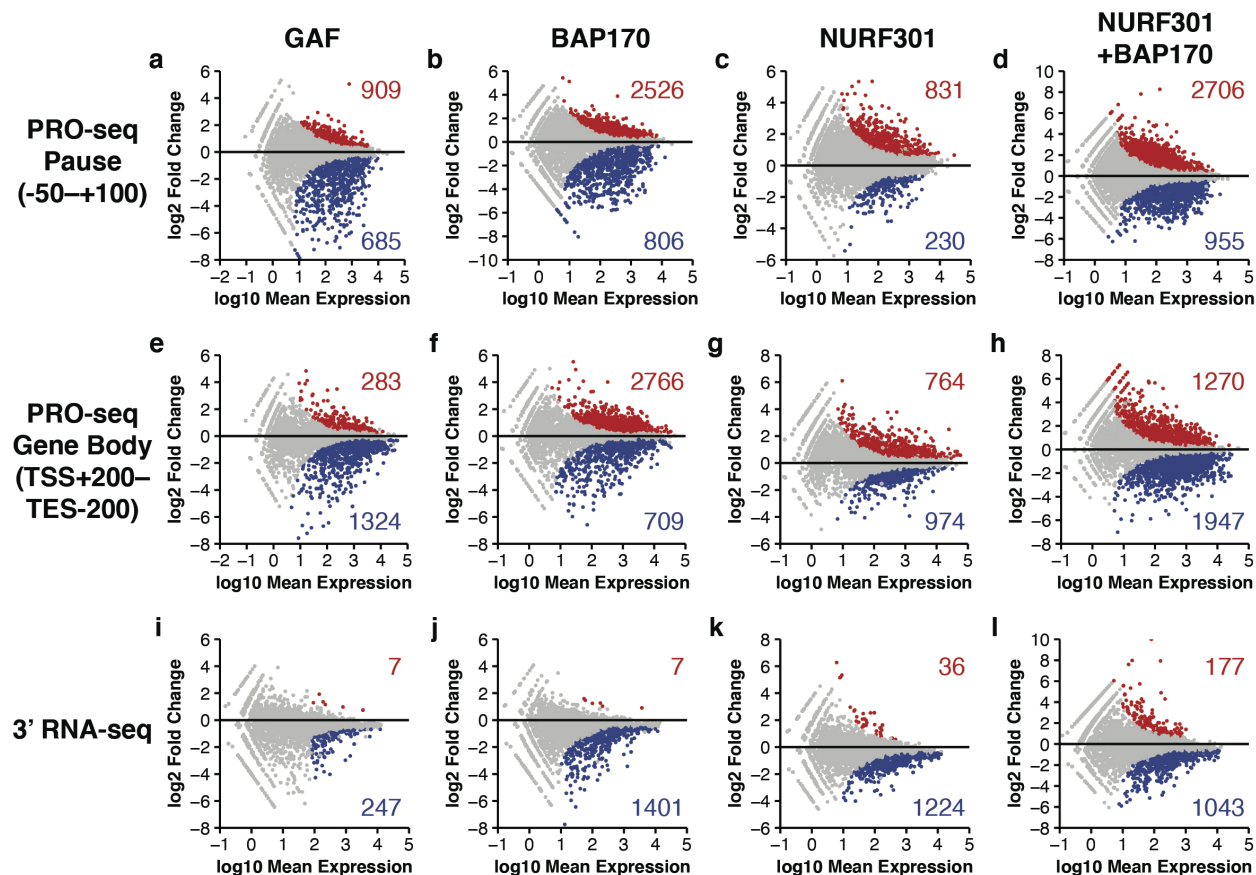

659

660 **Extended Data Figure 5: MA plots for all conditions and data types.**

- 661 (a) MA plot for the comparison of spike-in normalized GAF-RNAi vs. LACZ-RNAi PRO-  
 662 seq in the pause region (TSS -50 to +100); DESeq2 FDR < 0.01. Number of genes  
 663 significantly up- or down-regulated is also shown.  
 664 (b) As in (a) but BAP170 RNAi vs. LACZ-RNAi.  
 665 (c) As in (a) but NURF301 RNAi vs. LACZ-RNAi.  
 666 (d) As in (a) but NURF301+BAP170 RNAi vs. LACZ-RNAi.  
 667 (e) MA plot for the comparison of spike-in normalized GAF-RNAi vs. LACZ-RNAi PRO-  
 668 seq in the gene body (TSS+200–TES-200); DESeq2 FDR < 0.01. Number of genes  
 669 significantly up- or down-regulated is also shown.  
 670 (f) As in (e) but BAP170 RNAi vs. LACZ-RNAi.  
 671 (g) As in (e) but NURF301 RNAi vs. LACZ-RNAi.  
 672 (h) As in (e) but NURF301+BAP170 RNAi vs. LACZ-RNAi.  
 673 (i) MA plot for the comparison of spike-in normalized GAF-RNAi vs. LACZ-RNAi 3'RNA-  
 674 seq signal in the last 1 kb region of each gene; DESeq2 FDR < 0.01. Number of genes  
 675 significantly up- or down-regulated is also shown.  
 676 (j) As in (i) but BAP170 RNAi vs. LACZ-RNAi.

- 677        **(k)** As in **(i)** but NURF301 RNAi vs. LACZ-RNAi.  
678        **(l)** As in **(i)** but NURF301+BAP170 RNAi vs. LACZ-RNAi.  
679

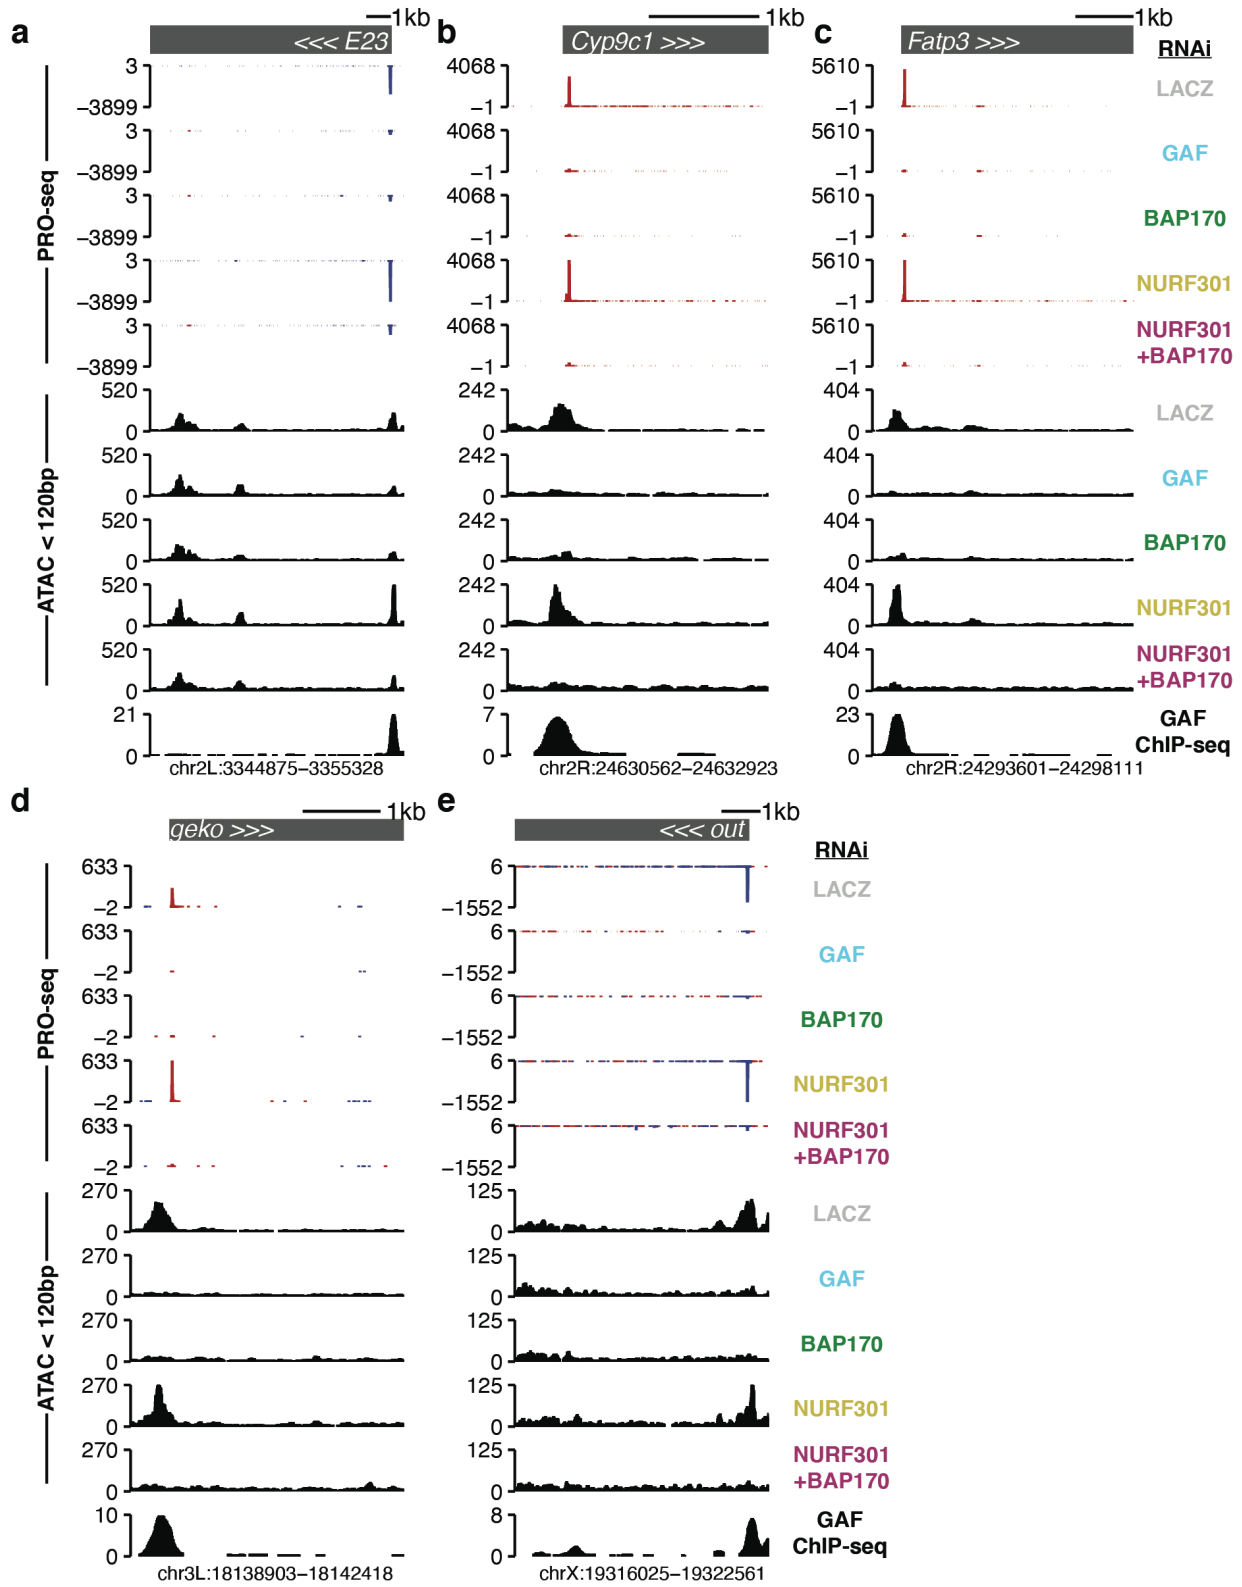

681 **Extended Data Figure 6: Examples of GAF-dependent promoters.**

682 **(a)** Browser shot of a gene with GAF-dependent pausing (*E23-RC*). Tracks are each shown  
683 as the mean of two replicates. ATAC-seq was filtered to retain only paired-end  
684 alignments with insert size < 120 bp.

685 **(b)** As in **(a)** but *Cyp9c1-RA*.

686 **(c)** As in **(a)** but *Fatp3-RA*.

687 **(d)** As in **(a)** but *geko-RB*.

688 **(e)** As in **(a)** but *out-RA*.

689

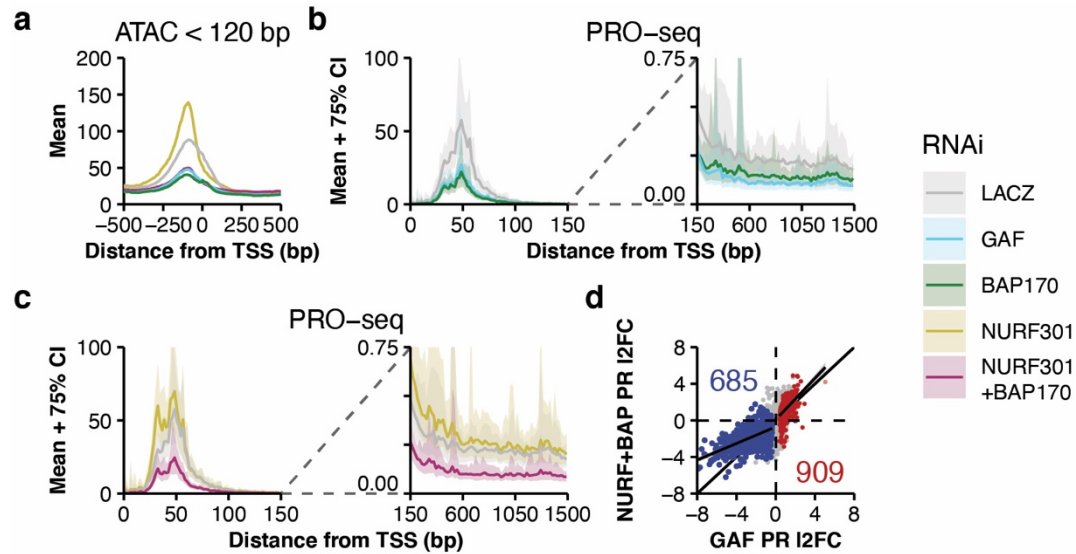

690

691 **Extended Data Figure 7: PBAP opens promoter chromatin in coordination with GAF.**

- 692 **(a)** ATAC-seq (< 120 bp) signal for each RNAi treatment in 1 bp bins across all promoters  
693 with significantly decreased PRO-seq signal in the pause region (-50+100) upon  
694 BAP170-RNAi treatment (n=806; see Extended Data Figure 5b; DESeq2 FDR < 0.01).  
695 Signal is the mean of 1,000 sub-samplings of 10% of regions.
- 696 **(b)** PRO-seq signal at genes with BAP170-dependent pausing (n=806) for the LACZ, GAF,  
697 and BAP170 RNAi treatments. The pause region (left panel) is in 2 bp bins, and the first  
698 1.5 kb of the gene body (right panel) is in 20 bp bins. Data is shown as mean (solid line)  
699 and 75% confidence interval (shaded area), derived from 1,000 sub-samplings of 10% of  
700 regions.
- 701 **(c)** As in **(b)**, but for LACZ, NURF301, and NURF301+BAP170 RNAi treatments.
- 702 **(d)** Pause region (TSS -50 to +100) PRO-seq log<sub>2</sub> fold change after GAF-RNAi treatment  
703 compared to NURF301+BAP170-RNAi. Red and blue points are significantly up- or  
704 down-regulated upon GAF-RNAi treatment (DESeq2 FDR < 0.01). The line and shaded  
705 area are a GLM and 95% confidence interval fit to significantly up- or down-regulated  
706 genes.  
707

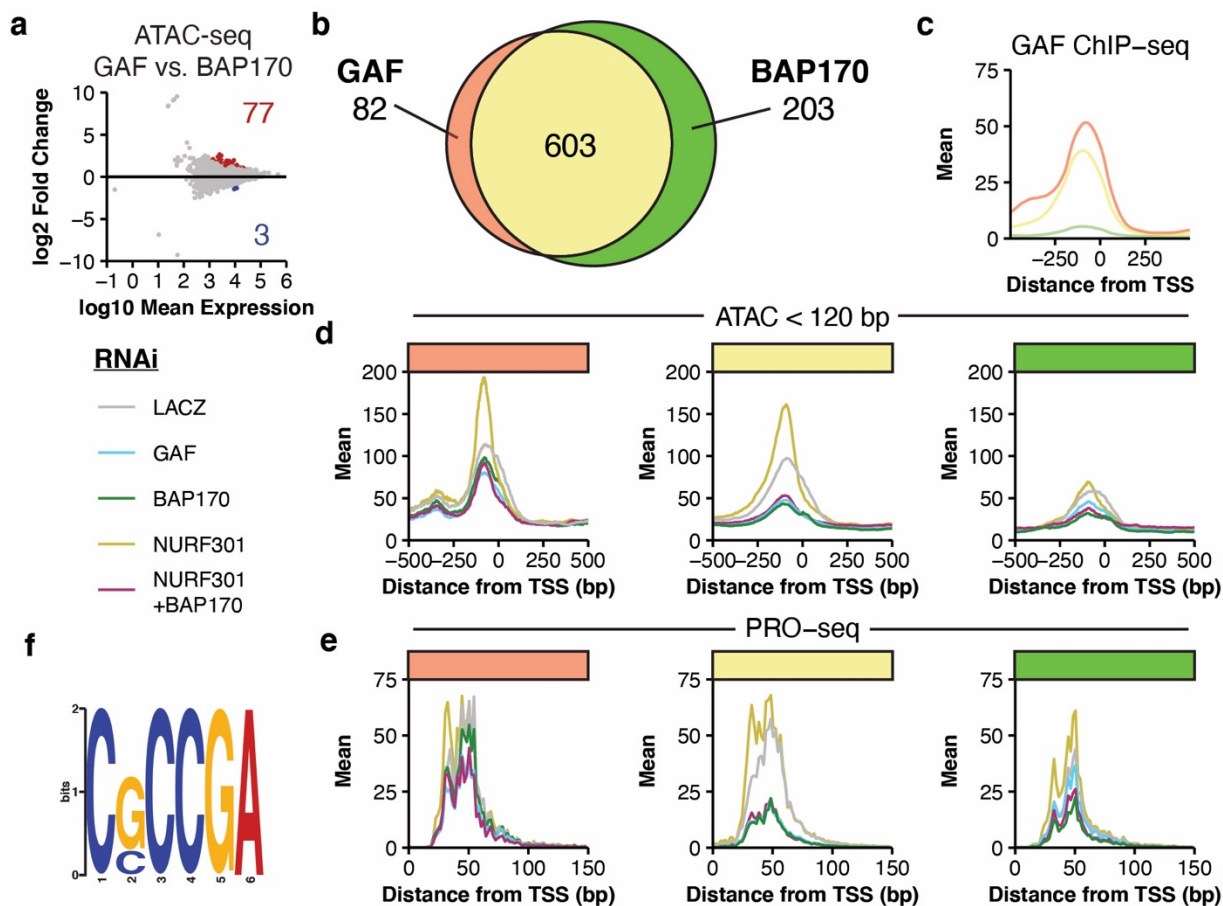

708

709 **Extended Data Figure 8: Effects of GAF and BAP-170 RNAi are indistinguishable.**

710 **(a)** MA plot for the comparison of GAF-RNAi vs. BAP170-RNAi ATAC-seq (fragments <  
711 120 bp) in ATAC-seq peak summits ± 100 bp (n=39,806); DESeq2 FDR < 0.01. Number  
712 of regions significantly up- or down-regulated is also shown.

713 **(b)** Intersection of promoters significantly downregulated by either GAF-RNAi (n=685) or  
714 BAP170-RNAi (n=806).

715 **(c)** Promoter GAF ChIP-seq signal in 5 bp bins at gene sets color coded as in **(b)**.

716 **(d)** Promoter ATAC-seq (fragments < 120 bp) signal for each RNAi treatment in 1 bp bins at  
717 gene sets defined in **(b)**. Signal is the mean of 1,000 sub-samplings of 10% of regions.

718 **(e)** Pause region PRO-seq signal for each RNAi treatment in 2 bp bins at gene sets defined in  
719 **(b)**. Signal is the mean of 1,000 sub-samplings of 10% of regions.

720 **(f)** Motif enriched in BAP170 exclusive promoters (-500 to TSS; n=203; green in **(b)**–**(e)**)  
721 over GAF/BAP170 dependent promoters (-500 to TSS; n=603; yellow in **(b)**–**(e)**).  
722 DREME E-value < 0.001.

723

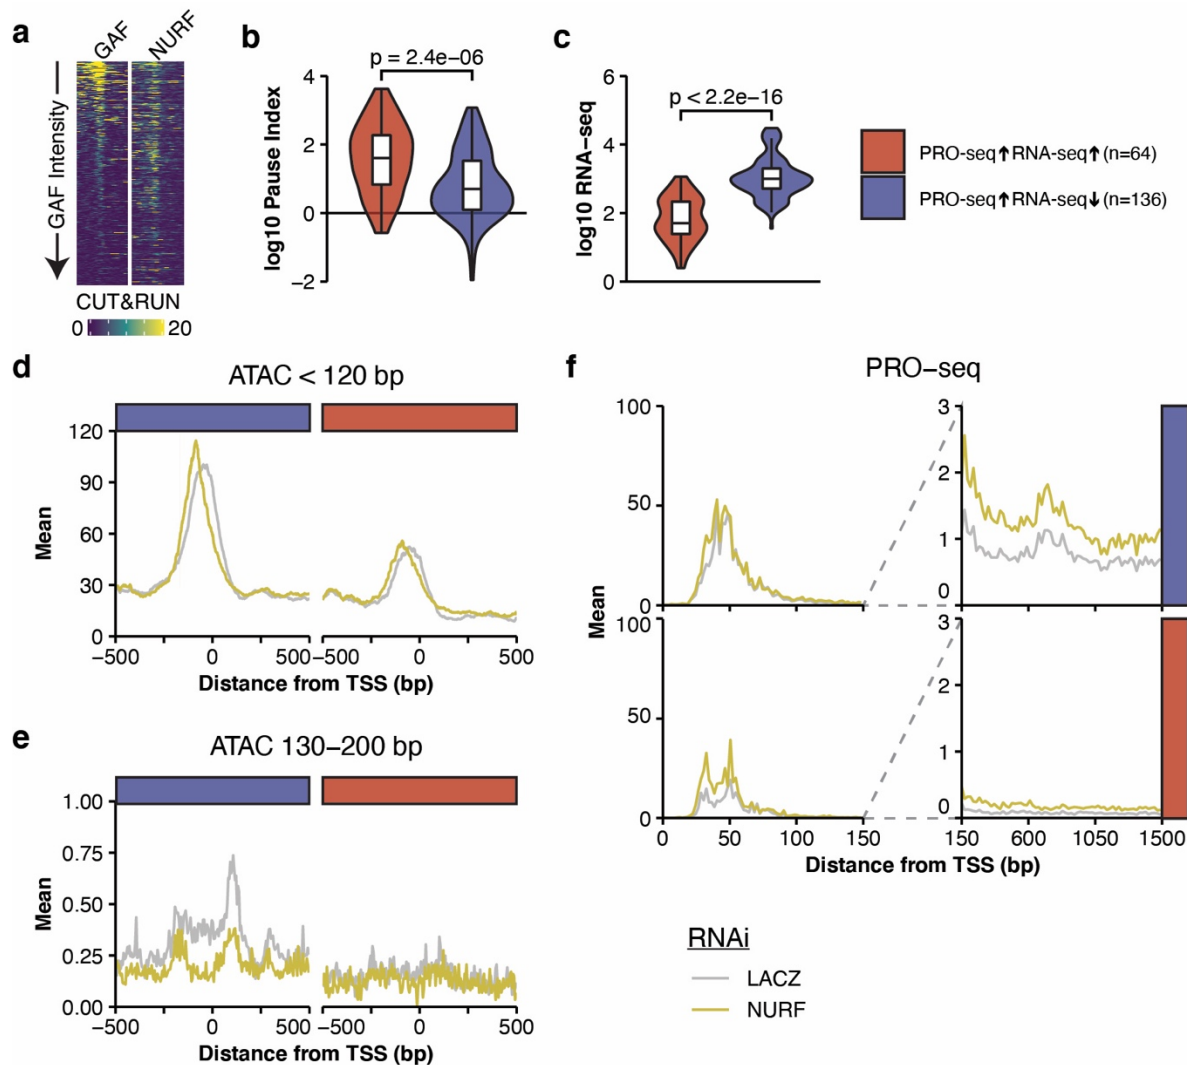

724

725 **Extended Data Figure 9: NURF-RNAi causes bifurcated changes in nascent transcription**  
 726 **and mRNA levels.**

- 727 **(a)** GAF and NURF301 CUT&RUN signal at the top quartile of genes by GAF CUT&RUN  
 728 signal (TSS  $\pm$  500). Rows are sorted by GAF signal and sort order is maintained.
- 729 **(b)** Distribution of Pause Indices (pause region PRO-seq signal / length normalized gene  
 730 body PRO-seq signal) for genes with increased gene body PRO-seq density and increased  
 731 RNA-seq signal (DESeq FDR < 0.1; n=64) or genes with increased gene body PRO-seq  
 732 density but decreased RNA-seq signal (n=136). See Figure 3a for gene classes.
- 733 **(c)** Distribution of RNA-seq normalized counts for the two classes of genes described in **(b)**.
- 734 **(d)** ATAC-seq (fragments < 120 bp) signal for NURF301 and LACZ RNAi treatments in 1  
 735 bp bins across promoters of the genes described in **(b)**. Signal is the mean of 1,000 sub-  
 736 samplings of 10% of regions.



737       **(e)** As in **(e)**, but ATAC-seq fragments 130–200 bp. Only the central 3 bp of each alignment  
738           were considered when generating signal tracks.

739       **(f)** PRO-seq signal for NURF301 and LACZ RNAi treatments at genes described in **(b)**. The  
740           pause region (left panel) is in 2 bp bins, and the first 1.5 kb of the gene body (right panel)  
741           is in 20 bp bins. Signal is the mean of 1,000 sub-samplings of 10% of regions.

742       In **(b)** and **(c)** filled violins represent the distribution and boxplots show the median (center  
743           line), 25% and 75% quartiles (hinges), and  $1.5 \times \text{IQR}$  (whiskers). Outliers are not plotted, and  
744           p-value is from a Mann-Whitney U test.
